# Supplementary material
Source: PubMed Central journal article supplement (PMC3973436)
Supplement: NIHMS541792-supplement-Supplemental_Digital_Content.pdf [file NIHMS541792-supplement-Supplemental_Digital_Content.pdf]

Supplemental Material

Title: Estimating personal exposures from ambient air-pollution measures: Using meta-analysis  
to assess measurement error

Authors: Katelyn M Holliday, Christy L Avery, Charles Poole, Kathleen McGraw, Ronald  
Williams, Duanping Liao, Richard L Smith, and Eric A Whitsel

Table of Contents

|                                                                                                                        |   |
|------------------------------------------------------------------------------------------------------------------------|---|
| eAppendix 1.....                                                                                                       | 2 |
| eTable 1. Study Characteristics.....                                                                                   | 3 |
| eTable 2. Participant Characteristics.....                                                                             | 4 |
| eTable 3. Environmental Characteristics.....                                                                           | 5 |
| eTable 4. Bivariable Meta-Regressions of the Relationship Between $r$ and Selected<br>Environment Characteristics..... | 6 |

## **eAppendix 1.**

### **Databases**

PubMed (1950 to October 2009)

Web of Science (1955 to October 2009 via ISI Web of Knowledge)

BIOSIS Previews (1969 to October 2009 via ISI Web of Knowledge)

EMBASE (1988 to 2009 Week 43 via OvidSP)

Environmental Sciences and Pollution Management (1967 to October 2009 via CSA Illumina)

Toxline (1965 to October 2009 via TOXNET)

Dissertations and Theses (1861 to October 2009 via Proquest)

### **Search Strategy**

((coarse[tw] OR respirable[tw] OR inhalable[tw] OR thoracic[tw]) AND

(particle\* OR particulate\* OR dust[tw]) OR pm 10[tw] OR pm10[tw]) AND

(ambient[tw] OR outdoor[tw] OR outdoors[tw] OR outside[tw] OR exterior[tw] OR external[tw]

OR background[tw] OR fixed site\*) AND

(longitudinal[tw] OR individual[tw] OR within person[tw] OR within persons[tw] OR

personal[tw]) AND

(correlat\* OR associat\* OR relat\* OR compar\* OR pearson[tw] OR spearman[tw]))

**eTable 1. Study Characteristics**

| Author, Year           | Sub-Study | Location                 |                   | Date       |            | Duration (months) |
|------------------------|-----------|--------------------------|-------------------|------------|------------|-------------------|
|                        |           | City                     | State/<br>Country | Start      | End        |                   |
| Lioy 1990              |           | Phillipsburg             | New Jersey        | 1/8/1988   | 1/22/1988  | 0.5               |
| Wallace 1996           |           | Azusa                    | California        | 3/6/1989   | 3/13/1989  | 0.3               |
| Janssen 1997           |           | Wageningen and Amsterdam | Netherlands       | 2/16/1994  | 5/18/1995  | 15.0              |
| Janssen 1998           |           | Amsterdam                | Netherlands       | 1/17/1994  | 12/23/1994 | 11.2              |
| Linn 1999              |           | Los Angeles              | California        | 10/24/1996 | 2/17/1997  | 3.8               |
| Rojas-Bracho 2000      |           | Boston                   | Massachusetts     | 2/5/1996   | 2/22/1997  | 12.6              |
| Sarnat 2000            | 1         | Baltimore                | Maryland          | 6/29/1998  | 8/7/1998   | 1.3               |
|                        | 2         | Baltimore                | Maryland          | 2/2/1999   | 3/13/1999  | 1.3               |
| Wheeler 2000           |           | London                   | England           | 1/1997     | 9/1997     | 9.0               |
| Rodes 2001             |           | Fresno                   | California        | 4/18/1999  | 5/15/1999  | 0.9               |
| Yip 2004               |           | Detroit                  | Michigan          | 2/12/2000  | 10/6/2001  | 19.8              |
| Watchalayann 2005      |           | Bangkok                  | Thailand          | 12/2002    | 8/2003     | 9.0               |
| Williams 2008          |           | central                  | North Carolina    | 4/2004     | 6/2004     | 3.0               |
| Arhami 2009            | 1         | San Gabriel Valley       | California        | 7/6/2005   | 12/10/2005 | 5.2               |
|                        | 2         | San Gabriel Valley       | California        | 8/24/2005  | 2/18/2006  | 5.9               |
|                        | 3         | San Gabriel Valley       | California        | 7/5/2006   | 12/1/2006  | 4.9               |
|                        | 4         | Riverside                | California        | 8/23/2006  | 2/16/2007  | 5.8               |
| Scapellato 2009        |           | Padova                   | Italy             | 6/21/2004  | 3/20/2006  | 21.0              |
| Hsu 2009               | 1         | New York                 | New York          | 07/2000    | 10/2000    | 4.0               |
|                        | 2         | New York                 | New York          | 11/2000    | 1/2001     | 3.0               |
|                        | 3         | Seattle                  | Washington        | 11/2002    | 03/2003    | 5.0               |
| 1990-2009 <sup>a</sup> | 21        | 19                       | 12                | 1988-2007  |            | 5                 |

<sup>a</sup>Summary statistics: ranges (year, date), counts (sub-study, location), median (duration)

**eTable 2. Participant Characteristics**

| Author                   | Sub-Study | n                | Mean Age          | %Female | Co-Morbidity               |
|--------------------------|-----------|------------------|-------------------|---------|----------------------------|
| Lioy 1990                |           | 14               | 46.5              | 57.1    | N                          |
| Wallace 1996             |           | 10               | 34.1              | 30      | N                          |
| Janssen 1997             |           | 45               | 10                | 53.3    | N                          |
| Janssen 1998             |           | 37               | 62                | 51.4    | N                          |
| Linn 1999 <sup>14</sup>  |           | 14               | 70 <sup>d</sup>   | 53.3    | P                          |
| Rojas-Bracho 2000        |           | 17               | NR                | NR      | P                          |
| Sarnat 2000 <sup>a</sup> | 1         | 14               | 75                | 60      | N                          |
|                          | 2         | 14               | 75                | 60      | N                          |
| Wheeler 2000             |           | 10               | 10                | 30      | N                          |
| Rodes 2001               |           | 14               | 85                | 68      | N                          |
| Yip 2004                 |           | 20               | 9 <sup>d</sup>    | 68      | A                          |
| Watchalayann 2005        |           | 28               | 47.5 <sup>d</sup> | NR      | N                          |
| Williams 2008            |           | 3                | 41                | 67      | A                          |
| Arhami 2009              | 1         | 17               | 84                | 41      | C                          |
|                          | 2         | 14               | 84                | 41      | C                          |
|                          | 3         | 17               | 84                | 41      | C                          |
|                          | 4         | 18               | 84                | 41      | C                          |
| Scapellato 2009          |           | 21               | 29 <sup>e</sup>   | 48.4    | A                          |
| Hsu 2009 <sup>c</sup>    | 1         | 9                | Elderly           | NC      | P                          |
|                          | 2         | 9                | Elderly           | NC      | P                          |
|                          | 3         | 15               | 75.5              | 53.3    | P, A                       |
| 1990-2009 <sup>f</sup>   | 21        | 342 <sup>g</sup> | 66 (9-85)         | 53.3    | 43% N, 24% P, 19% A, 19% C |

Abbreviations: n, number of participants; NR, not reported; NC, not collected; N, none; P, chronic obstructive pulmonary disease; A, asthma; C, coronary artery disease

<sup>a</sup> Includes 9 overlapping participants in the two sub-studies, <sup>b</sup> Includes 4 sub-studies of independent participants, <sup>c</sup> Includes 9 overlapping participants in the two NY sub-studies, <sup>d</sup> Median of range, <sup>e</sup> Median of inclusion criteria age range, <sup>f</sup> Summary Statistics: range (year, age), counts (sub-studies), totals (n), median (age, percent female), percent of studies (co-morbidities), <sup>g</sup> Number of independent participants

**eTable 3. Environmental Characteristics**

| Author                             | Sub-Study | T<br>(°C) | DP<br>(°C) | SLP<br>(kPa) | RH<br>(%) | WS<br>(m/s) | n    | PM <sub>10</sub> µg/m <sup>3</sup> Mean (SD) |                          | r <sub>j</sub> (95% CI)           |
|------------------------------------|-----------|-----------|------------|--------------|-----------|-------------|------|----------------------------------------------|--------------------------|-----------------------------------|
|                                    |           |           |            |              |           |             |      | Personal                                     | Ambient <sup>a</sup>     |                                   |
| Liroy 1990                         |           | -3.8      | -9.6       | 102.3        | 64.0      | 3.0         | 12.9 | 86                                           | 60 <sup>a</sup>          | 0.70 (0.57 to 0.79) <sup>c</sup>  |
| Wallace 1996                       |           | 16.6      | 4.9        | .            | 45.9      | 2.8         | 7.2  | 115                                          | 62.6 (3.5)               | 0.27 (-0.02 to 0.52)              |
| Janssen 1997                       |           | 6.7       | 3.6        | 101.2        | 80.6      | 4.7         | 6.7  | 105.2 (28.7)                                 | 38.5 (5.6) <sup>a</sup>  | 0.63 (0.53 to 0.71) <sup>c</sup>  |
| Janssen 1998                       |           | 6.7       | 4.4        | 101.5        | 85.3      | 6.6         | 7.1  | 61.7 (18.3)                                  | 41.5 (4.3) <sup>a</sup>  | 0.58 (0.45 to 0.69) <sup>c</sup>  |
| Linn 1999                          |           | 15.0      | 7.2        | 101.8        | 59.6      | 3.2         | 4.0  | 34.9 (15.1)                                  | 32.4 (12.9) <sup>a</sup> | 0.35 (-0.25 to 0.75) <sup>c</sup> |
| Rojas-Bracho 2000                  |           | 13.6      | 7.8        | 101.5        | 68.0      | 4.6         | 12.8 | 37.2 (22.8)                                  | 22.2 (18.7)              | 0.32 (0.17 to 0.46)               |
| Sarnat 2000                        | 1         | 25.1      | 17.5       | 101.6        | 62.8      | 2.6         | 11.3 | 29.9(10.8)                                   | 34.0(12.8) <sup>a</sup>  | 0.62 (0.49 to 0.72)               |
|                                    | 2         | 3.4       | -3.9       | 101.8        | 58.8      | 4.1         | 11.3 | 23.3(15.1)                                   | 26.8 (12.0) <sup>a</sup> | 0.45 (0.17 to 0.67)               |
| Wheeler 2000                       |           | 13.0      | 6.9        | 101.8        | 66.5      | 4.0         | 8.1  | 56.0 (31.8)                                  | 25.8 (20.9)              | 0.38 (0.02 to 0.65) <sup>c</sup>  |
| Rodes 2001 <sup>18, 19</sup>       |           | 17.6      | 5.1        | 101.4        | 43.7      | 4.5         | 6.6  | 37.7 (14.7)                                  | 24.3 (5.9) <sup>a</sup>  | 0.23 (-0.10 to 0.52) <sup>c</sup> |
| Yip 2004                           |           | 13.2      | 7.4        | 101.8        | 67.9      | 3.8         | 18.0 | 56.5 (38.2)                                  | 25.9 (13.4) <sup>a</sup> | 0.30 (0.19 to 0.40) <sup>c</sup>  |
| Watchalayann 2005                  |           | 29.5      | 23.7       | 100.9        | 71.1      | 1.6         | 9.3  | 81.6 (14.3)                                  | 130.7(39.0)              | 0.71 (0.62 to 0.77) <sup>b</sup>  |
| Williams 2008                      |           | 18.3      | 11.0       | 101.6        | 62.5      | 2.3         | 4.0  | 34.4 (7.5)                                   | 19.4 (8.0) <sup>a</sup>  | 0.69 (-0.28 to 0.96) <sup>c</sup> |
| Arhami 2009                        | 1         | 19.7      | 10.0       | 101.5        | 53.6      | 2.4         | 8.6  | 19.9 (15.6)                                  | 33.0 (11.0)              | 0.46 (0.19 to 0.67) <sup>c</sup>  |
|                                    | 2         | 17.1      | 7.3        | 101.5        | 52.5      | 1.4         | 8.0  | 17.5 (8.3)                                   | 32.8 (12.2)              | 0.62 (0.33 to 0.80) <sup>c</sup>  |
|                                    | 3         | 20.9      | 9.6        | 101.5        | 48.4      | 2.2         | 7.6  | 15.3 (6.7)                                   | 30.8 (13.2)              | 0.72 (0.53 to 0.85) <sup>c</sup>  |
|                                    | 4         | 18.7      | 5.9        | 101.5        | 43.1      | 2.6         | 8.9  | 11.5 (6.5)                                   | 25.7 (13.8)              | 0.67 (0.56 to 0.76) <sup>c</sup>  |
| Scapellato 2009                    |           | 12.9      | 7.4        | 101.7        | 69.2      | 1.1         | 5.1  | 78.8                                         | 60.6 <sup>a</sup>        | 0.68 (0.49 to 0.81) <sup>b</sup>  |
| Hsu 2009                           | 1         | 18.5      | 13.2       | 101.7        | 71.3      | 3.5         | 12.0 | 71.1                                         | 20.6                     | 0.25 (-0.01 to 0.48) <sup>b</sup> |
|                                    | 2         | 1.9       | -3.7       | 101.7        | 66.4      | 4.5         | 12.0 | 52.6                                         | 18.8                     | 0.43 (0.19 to 0.62) <sup>b</sup>  |
|                                    | 3         | 7.9       | 4.7        | 101.7        | 80.2      | 3.5         | 12.0 | 30.2                                         | 13.6                     | 0.13 (-0.02 to 0.27) <sup>b</sup> |
| 15 Studies, 1990-2009 <sup>d</sup> | 21        | 15.0      | 7.2        | 101.6        | 64.0      | 3.2         | 8.6  | 37.7                                         | 30.8                     | 0.46                              |

Abbreviations: T, mean temperature; DP, mean dew point; SLP, mean sea level pressure; RH, mean relative humidity; WS, mean wind speed; n, mean number of paired ambient-personal measurements per participant; SD, standard deviation; r, random-effects meta-analyzed summary correlation coefficient weighting individual correlation coefficients by number of measurements; CI, confidence interval

<sup>a</sup> Indicates ambient; otherwise outdoor

<sup>b</sup> Individual level data unavailable for random-effects meta-analysis; reported median used for r and fixed-effects used for SD

<sup>c</sup> Authors contacted for primary data; additional data for Liroy 1990 published in Wallace 1996 Table 12<sup>13</sup>

<sup>d</sup> Summary statistics: medians

**eTable 4. Bivariable Meta-Regressions of the Relationship Between *r* and Selected Environment Characteristics**

|              |                                   |                                | <i>r</i> difference (95% CI) |
|--------------|-----------------------------------|--------------------------------|------------------------------|
| Regression 1 | Mean Ambient PM <sub>10</sub>     | ≥30.8 μg/m <sup>3</sup> (n=11) | 0.18 (-0.02 to 0.37)         |
|              |                                   | <30.8 μg/m <sup>3</sup> (n=10) | 0                            |
|              | Ambient/Personal PM <sub>10</sub> | ≥0.67 (n=11)                   | 0.28 (0.09 to 0.37)          |
|              |                                   | <0.67 (n=10)                   | 0                            |
| Regression 2 | Mean Ambient PM <sub>10</sub>     | ≥30.8 μg/m <sup>3</sup> (n=11) | 0.21 (-0.01 to 0.42)         |
|              |                                   | <30.8 μg/m <sup>3</sup> (n=10) | 0                            |
|              | Wind Speed                        | ≥3.2 m/s (n=11)                | -0.22 (-0.43 to -0.003)      |
|              |                                   | <3.2 m/s (n=10)                | 0                            |
| Regression 3 | Ambient/Personal PM <sub>10</sub> | ≥0.67 (n=11)                   | 0.28 (0.04 to 0.52)          |
|              |                                   | <0.67 (n=10)                   | 0                            |
|              | Wind Speed                        | ≥3.2 m/s (n=11)                | -0.15 (-0.39 to 0.09)        |
|              |                                   | <3.2 m/s (n=10)                | 0                            |
